# Supplementary material
Source: Springer Nature journal article supplement (https://www.springermedizin.de/resource/supplementary/12885_2013_4511_MOESM5_ESM.pdf/9466482)

| Drug     | p15 | p16 | p14 <sup>ARF</sup> | p73 | E-cadh | p53 | MDM2  | CDK4 | cycD1 | p27   | P-Src | PDGFR $\alpha$ | P-cKit | PTEN  |
|----------|-----|-----|--------------------|-----|--------|-----|-------|------|-------|-------|-------|----------------|--------|-------|
| Trabect. |     |     |                    |     |        |     | 26,36 |      |       | -2,35 |       |                |        | -4,2  |
| Zalypsis |     |     |                    |     |        |     |       |      |       |       |       |                |        | -1,45 |

**B**

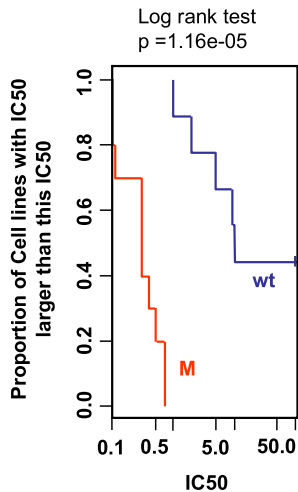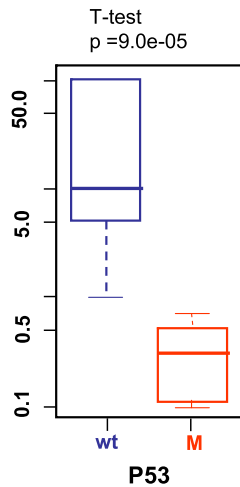

**C**

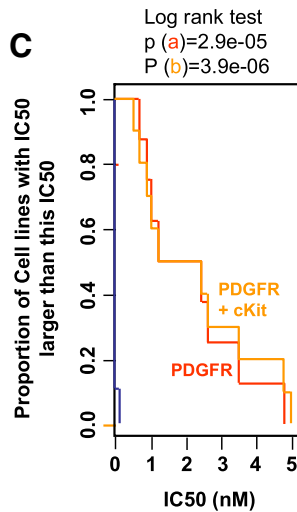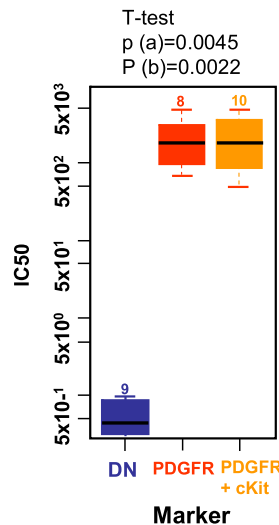

**D**

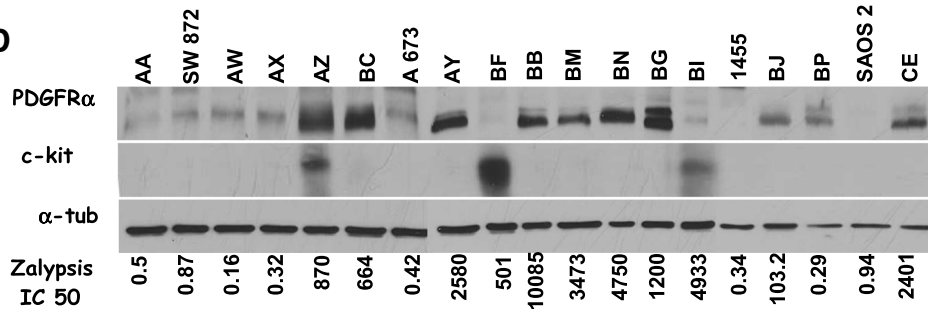

Supplement: MOESM5 [file 9466482]
